# Supplementary material for: Searching for differentially expressed gene combinations
Source: PubMed Central journal article supplement (PMC1257471; doi:10.1186/gb-2005-6-10-r88), 2005-09-19
Supplement: gb-2005-6-10-r88-S1.pdf [file gb-2005-6-10-r88-S1.pdf]

Gene Pair 1 , Score = 1.5

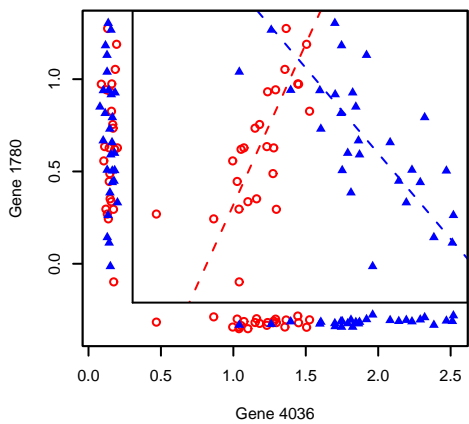

Gene Pair 2 , Score = 1.48

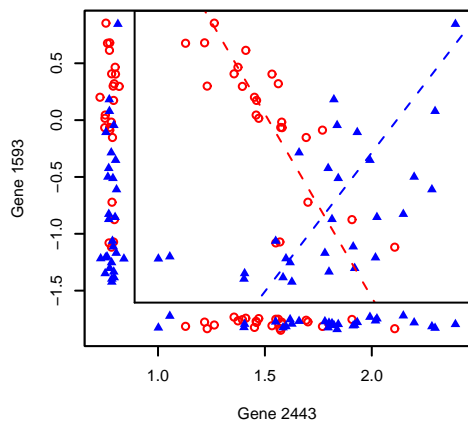

Gene Pair 3 , Score = 1.45

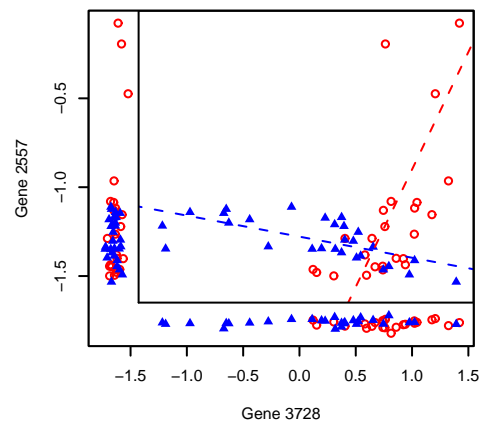

Gene Pair 4 , Score = 1.44

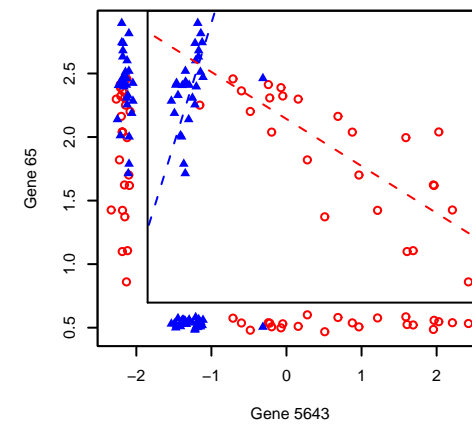

Gene Pair 5 , Score = 1.44

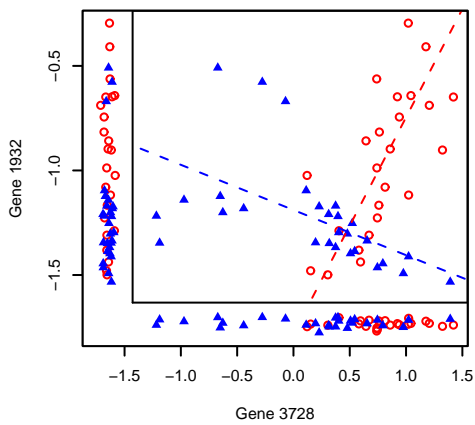

Gene Pair 6 , Score = 1.43

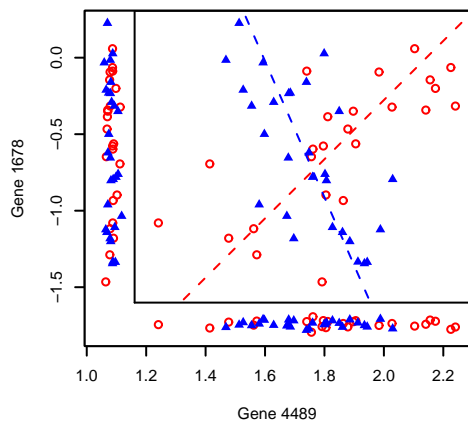

Gene Pair 7 , Score = 1.43

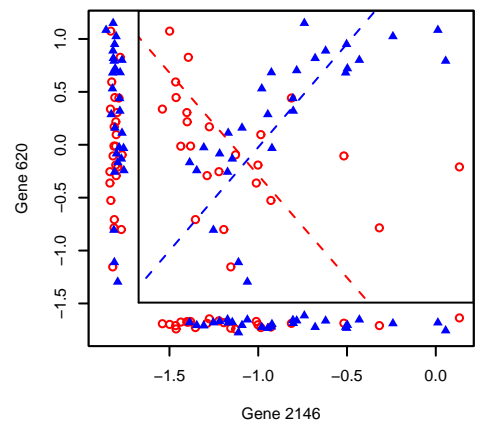

Gene Pair 8 , Score = 1.42

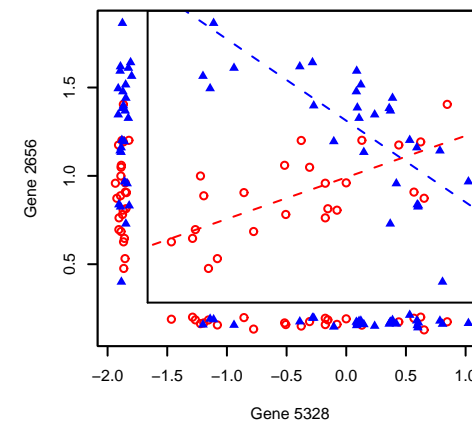

Gene Pair 9 , Score = 1.42

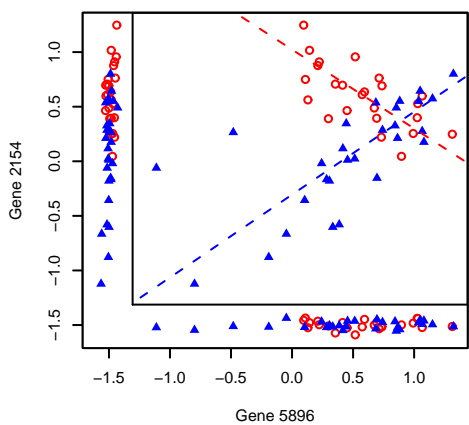

Gene Pair 10 , Score = 1.41

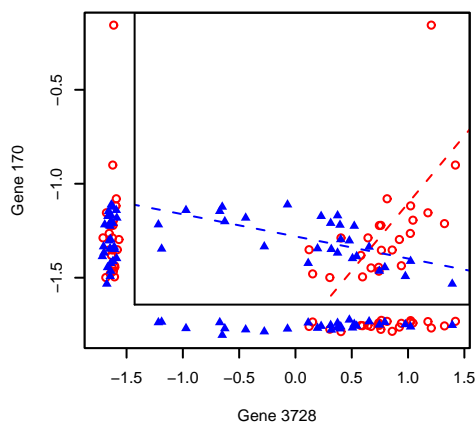

Gene Pair 11 , Score = 1.4

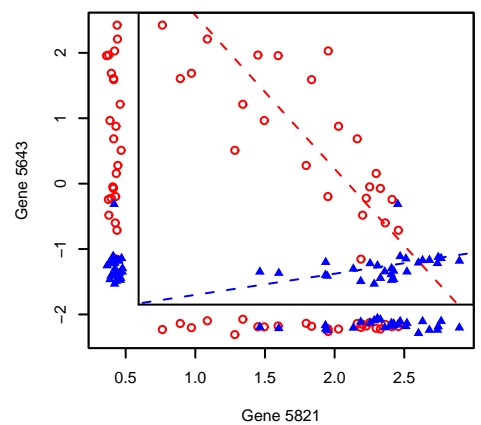

Gene Pair 12 , Score = 1.4

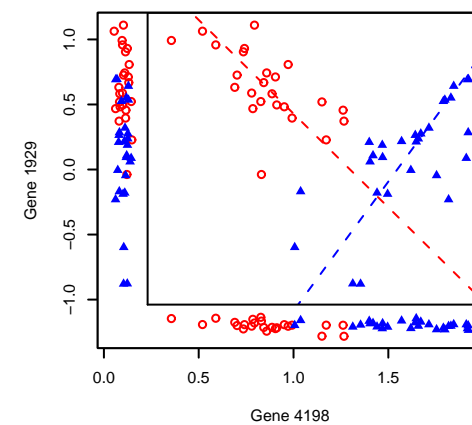

Gap/Substitution

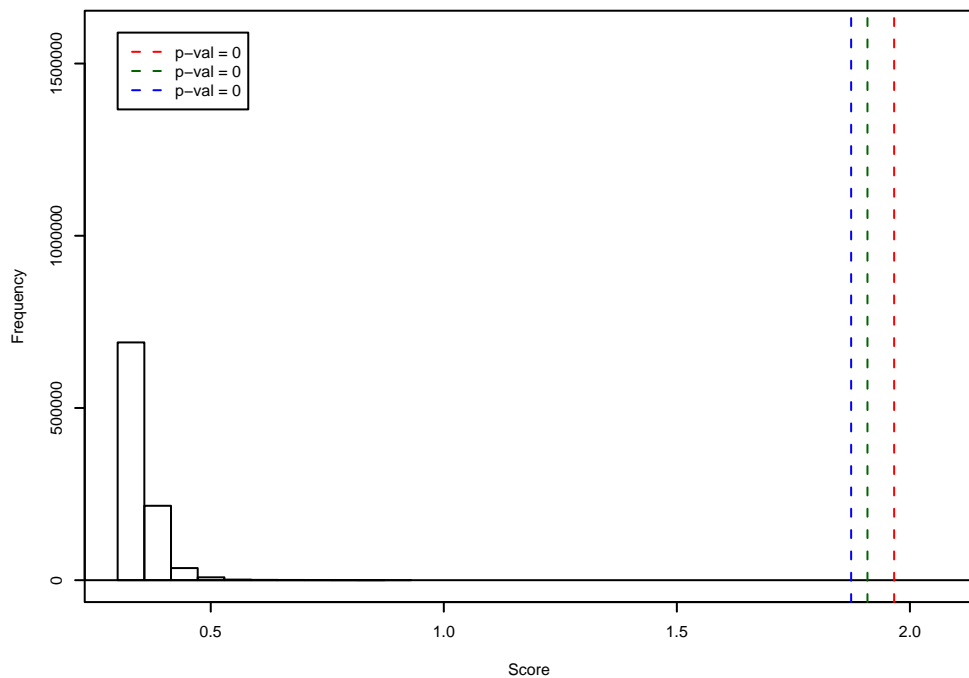

On/Off

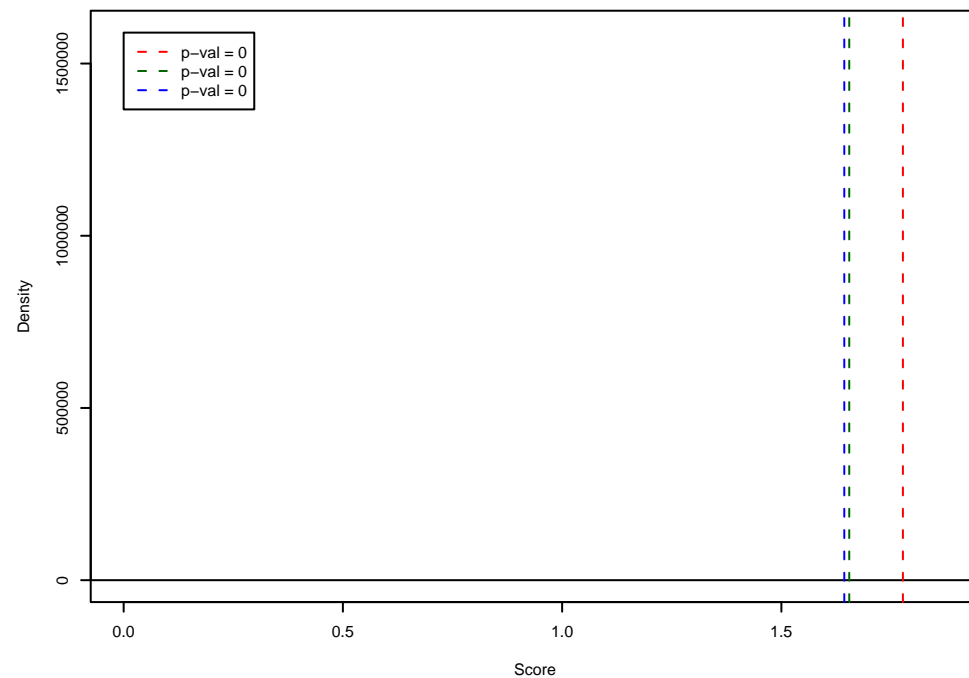

| p-value | # gp exceeding | % gp exceeding | fold advantage |
|---------|----------------|----------------|----------------|
| 0e+00   | 138841         | 0.728          | Inf            |
| 1e-06   | 209154         | 1.097          | 10965.07       |
| 1e-05   | 346638         | 1.817          | 1817.28        |
| 1e-04   | 1193706        | 6.258          | 625.81         |
| 1e-03   | 2889226        | 15.147         | 151.47         |

| p-value | # gp exceeding | % gp exceeding | fold advantage |
|---------|----------------|----------------|----------------|
| 0e+00   | 323            | 0.002          | Inf            |
| 1e-06   | 1997           | 0.010          | 104.69         |
| 1e-05   | 6640           | 0.035          | 34.81          |
| 1e-04   | 25284          | 0.133          | 13.26          |
| 1e-03   | 116386         | 0.610          | 6.10           |
