# Supplementary material for: Searching for differentially expressed gene combinations
Source: PubMed Central journal article supplement (PMC1257471; doi:10.1186/gb-2005-6-10-r88), 2005-09-19
Supplement: gb-2005-6-10-r88-S2.pdf [file gb-2005-6-10-r88-S2.pdf]

Gene Pair 1 , Score = 2.46

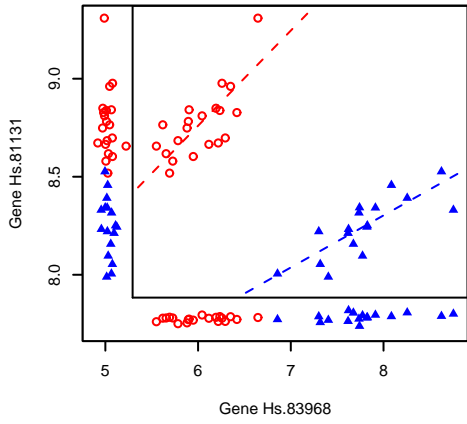

Gene Pair 2 , Score = 2.43

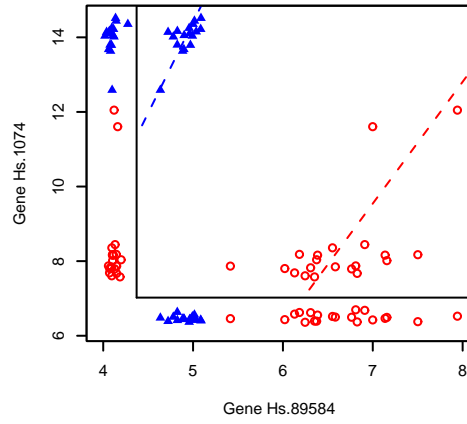

Gene Pair 3 , Score = 2.39

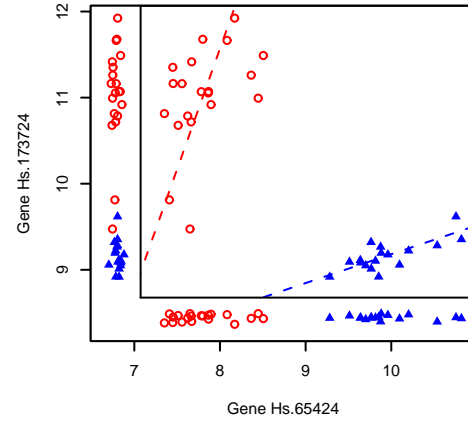

Gene Pair 4 , Score = 2.34

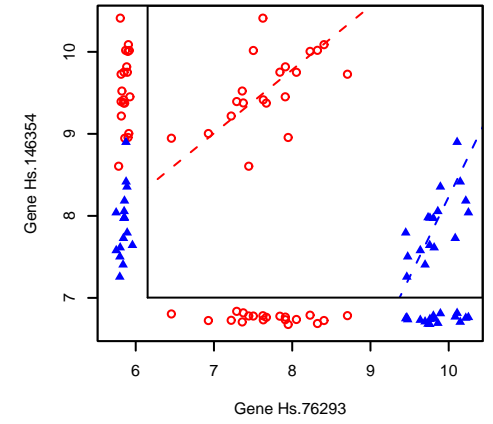

Gene Pair 5 , Score = 2.34

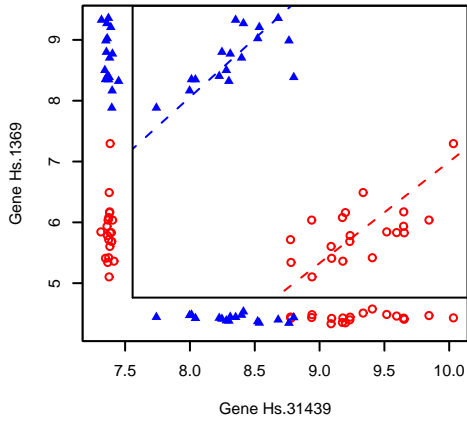

Gene Pair 6 , Score = 2.31

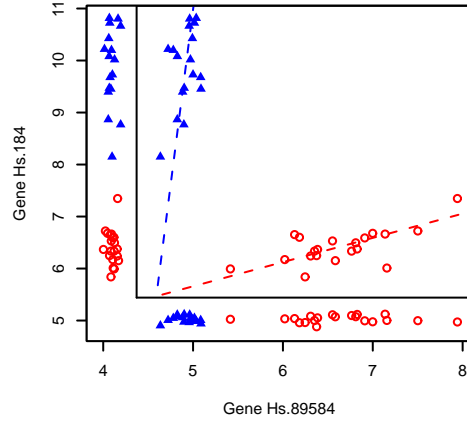

Gene Pair 7 , Score = 2.31

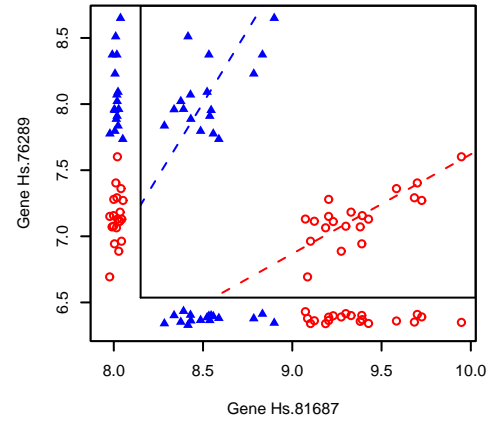

Gene Pair 8 , Score = 2.3

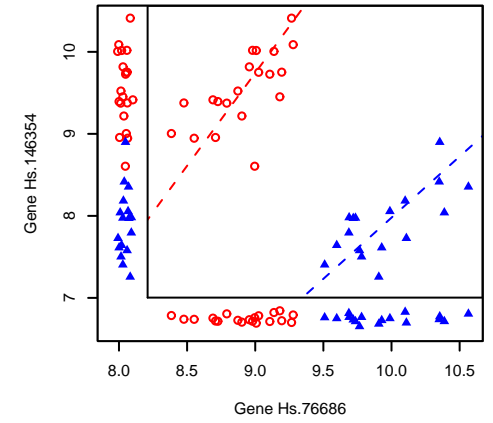

Gene Pair 9 , Score = 2.3

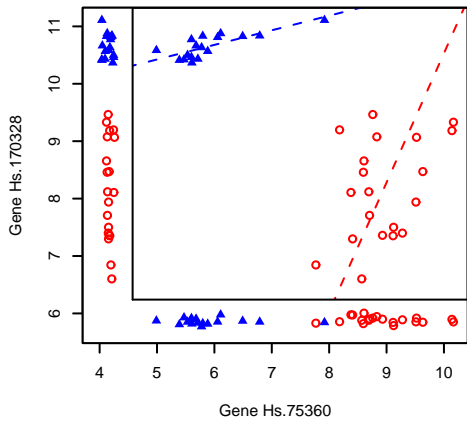

Gene Pair 10 , Score = 2.28

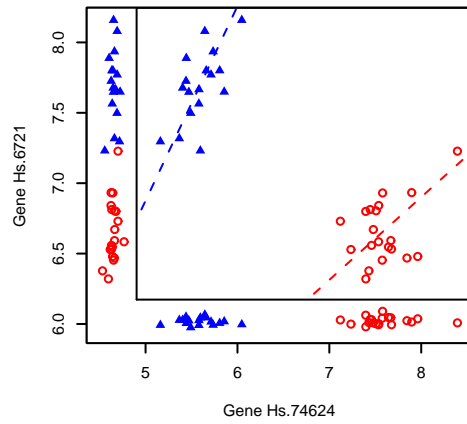

Gene Pair 11 , Score = 2.28

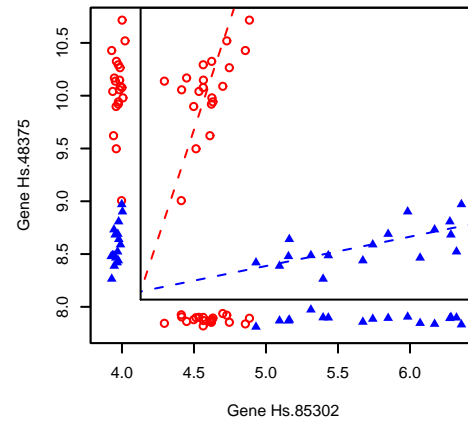

Gene Pair 12 , Score = 2.27

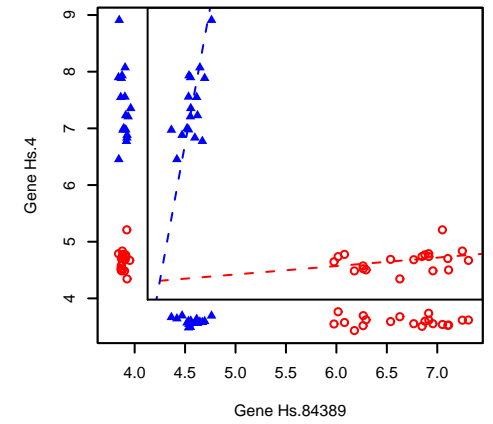

Gene Pair 1 , Score = 1.65

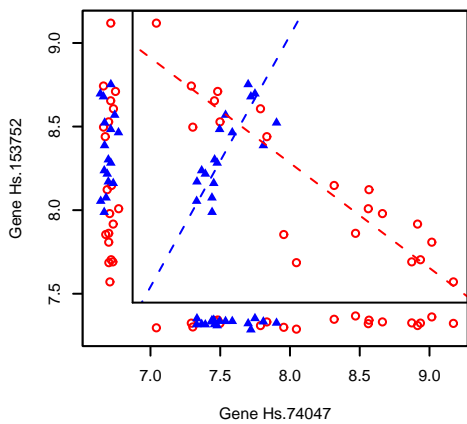

Gene Pair 2 , Score = 1.59

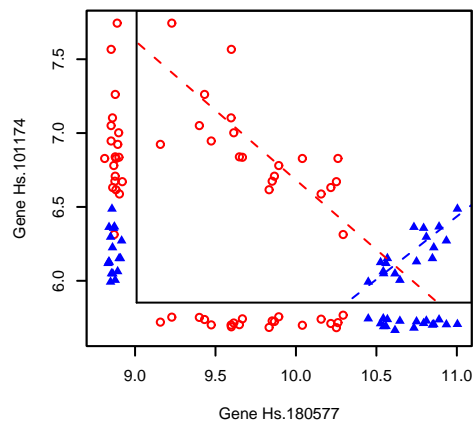

Gene Pair 3 , Score = 1.59

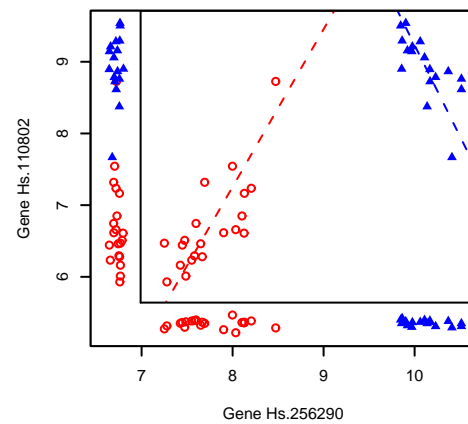

Gene Pair 4 , Score = 1.57

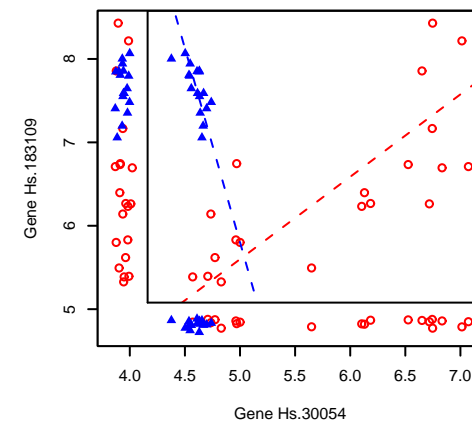

Gene Pair 5 , Score = 1.57

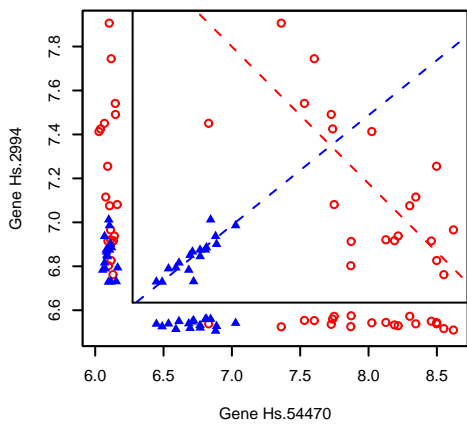

Gene Pair 6 , Score = 1.54

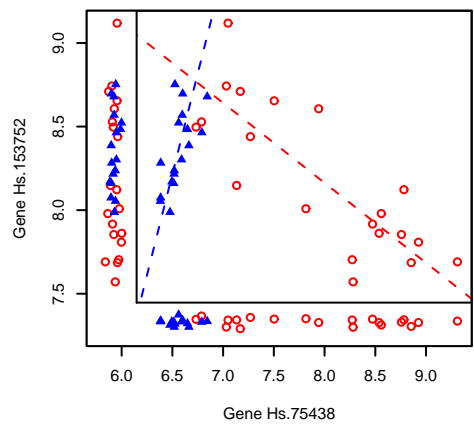

Gene Pair 7 , Score = 1.54

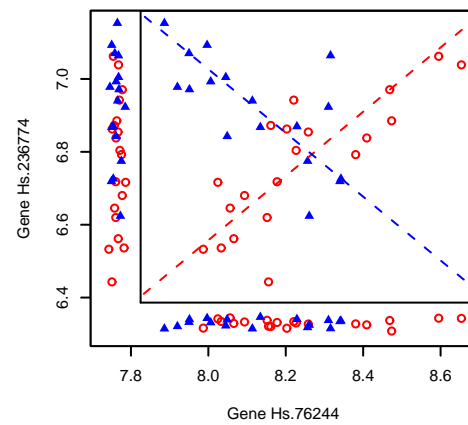

Gene Pair 8 , Score = 1.53

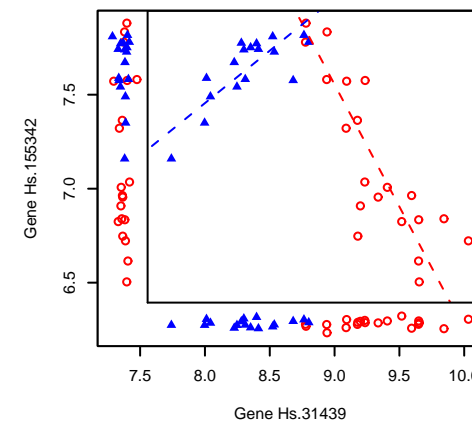

Gene Pair 9 , Score = 1.53

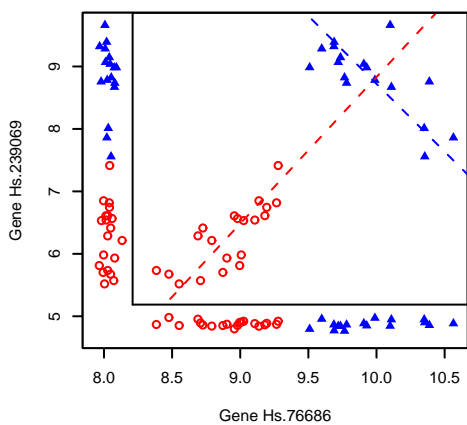

Gene Pair 10 , Score = 1.53

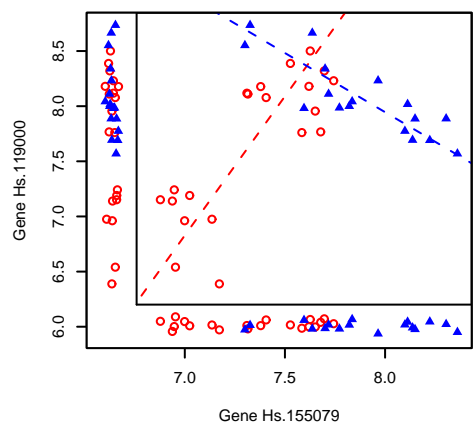

Gene Pair 11 , Score = 1.53

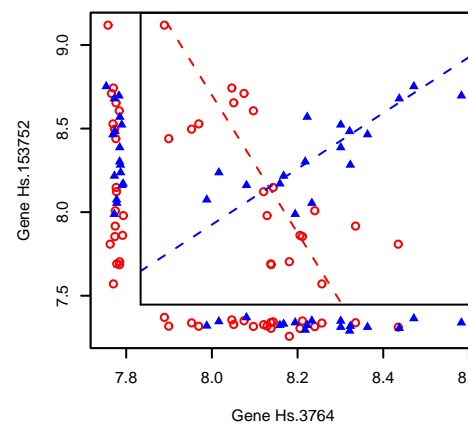

Gene Pair 12 , Score = 1.52

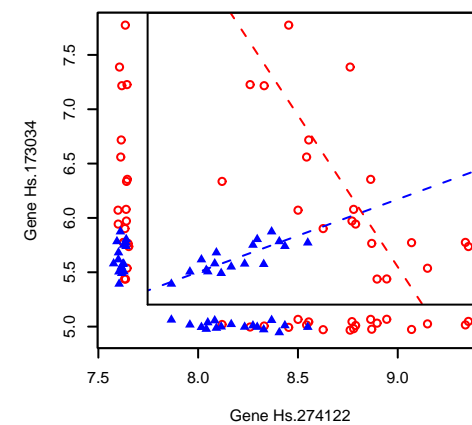

Gap/Substitution

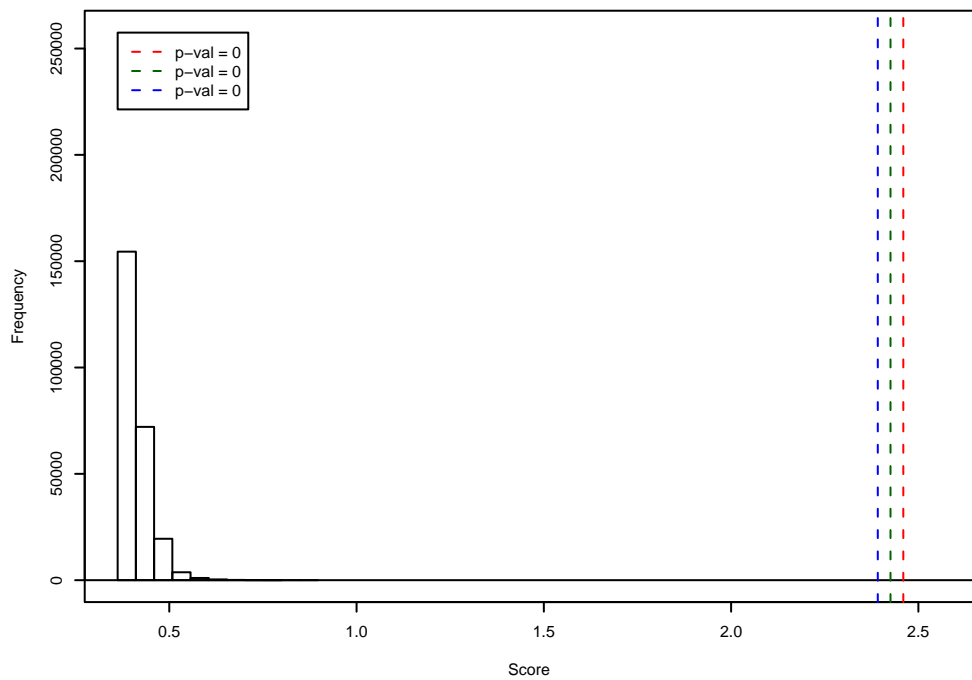

On/Off

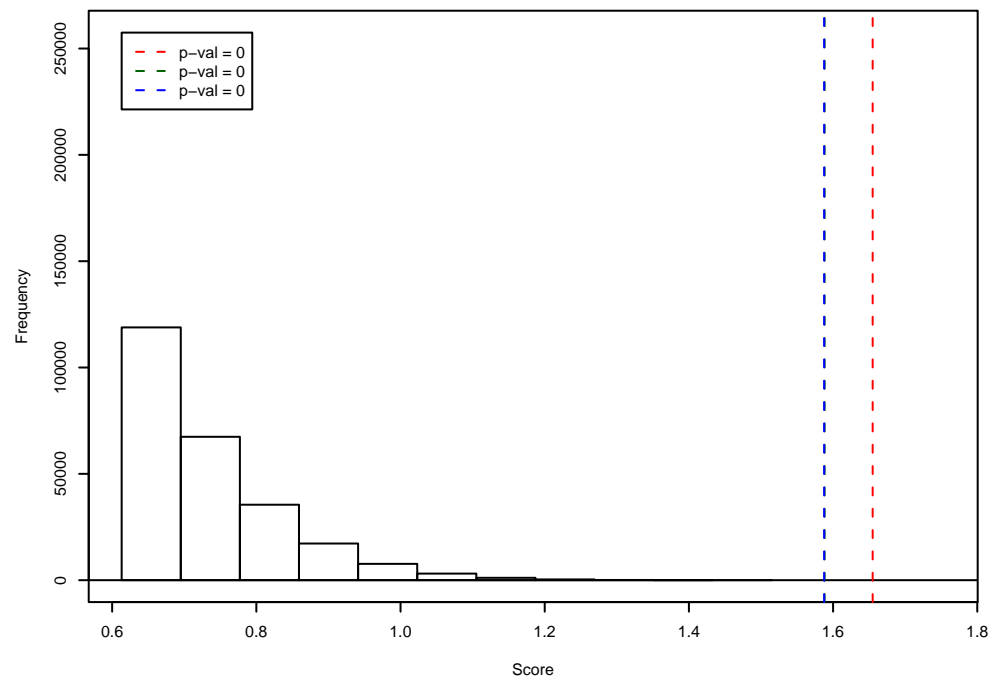

| p-value | # gp exceeding | % gp exceeding | fold advantage |
|---------|----------------|----------------|----------------|
| 0e+00   | 351008         | 6.984          | Inf            |
| 1e-06   | 498813         | 9.925          | 99245.83       |
| 1e-05   | 674817         | 13.426         | 13426.43       |
| 1e-04   | 922033         | 18.345         | 1834.51        |
| 1e-03   | 1243663        | 24.744         | 247.44         |

| p-value | # gp exceeding | % gp exceeding | fold advantage |
|---------|----------------|----------------|----------------|
| 0e+00   | 14             | 0.000          | Inf            |
| 1e-06   | 81             | 0.002          | 16.12          |
| 1e-05   | 481            | 0.010          | 9.57           |
| 1e-04   | 3045           | 0.061          | 6.06           |
| 1e-03   | 18805          | 0.374          | 3.74           |
