# Supplementary material for: Searching for differentially expressed gene combinations
Source: PubMed Central journal article supplement (PMC1257471; doi:10.1186/gb-2005-6-10-r88), 2005-09-19
Supplement: gb-2005-6-10-r88-S3.pdf [file gb-2005-6-10-r88-S3.pdf]

Gene Pair 1 , Score = 1.36

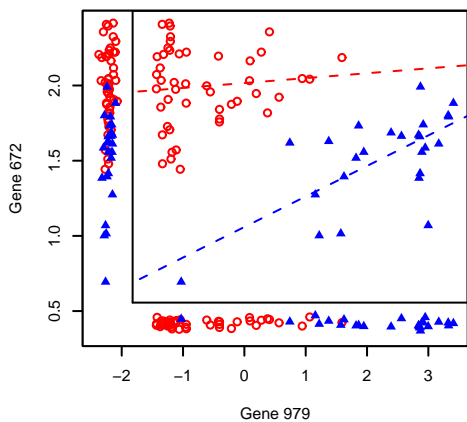

Gene Pair 2 , Score = 1.32

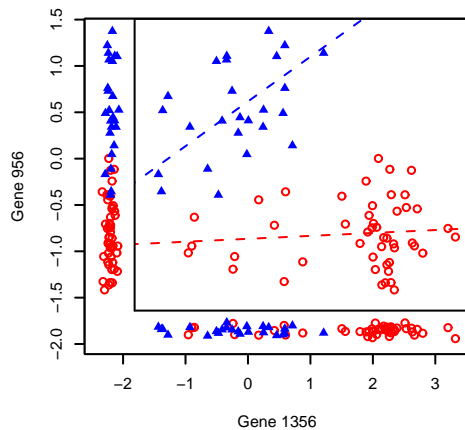

Gene Pair 3 , Score = 1.3

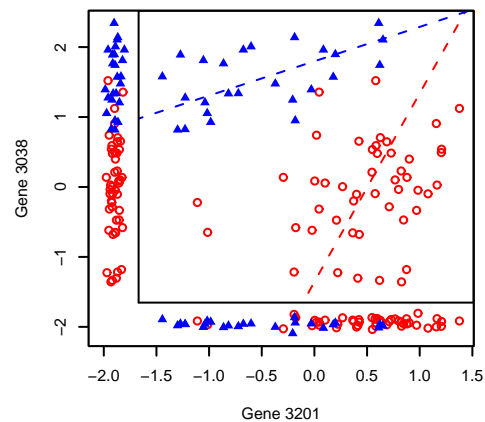

Gene Pair 4 , Score = 1.26

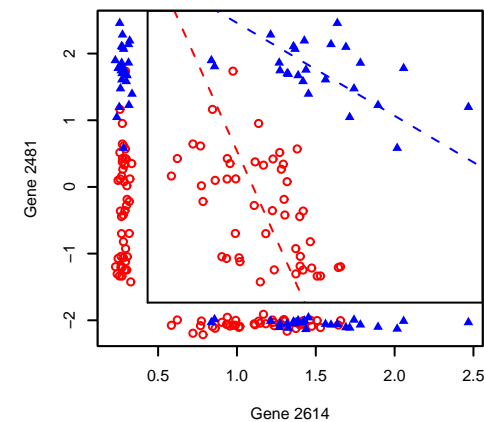

Gene Pair 5 , Score = 1.25

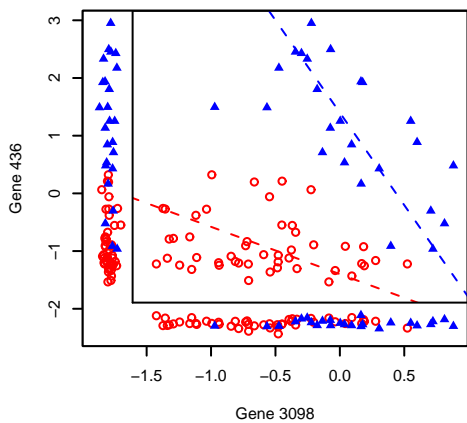

Gene Pair 6 , Score = 1.25

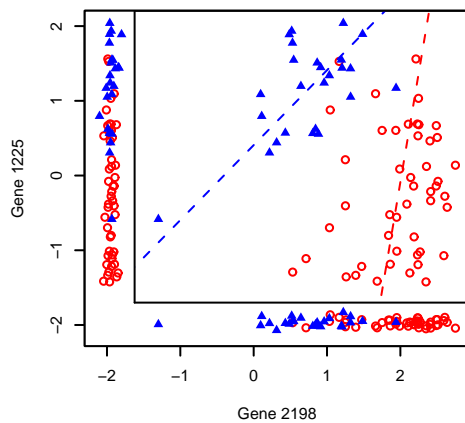

Gene Pair 7 , Score = 1.22

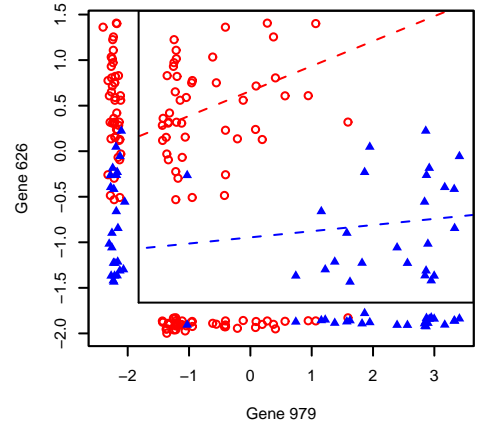

Gene Pair 8 , Score = 1.21

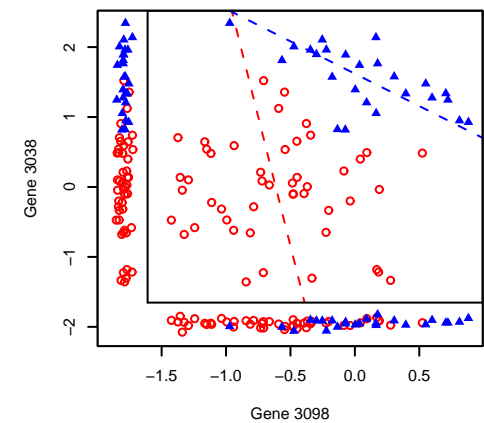

Gene Pair 9 , Score = 1.2

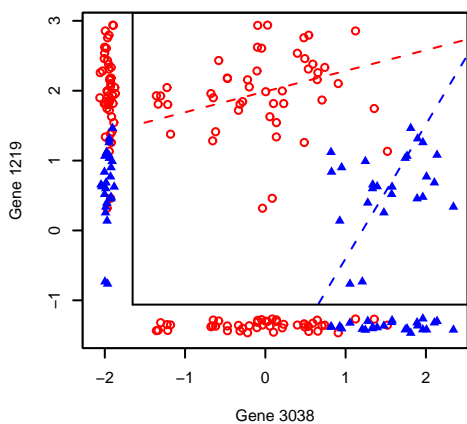

Gene Pair 10 , Score = 1.2

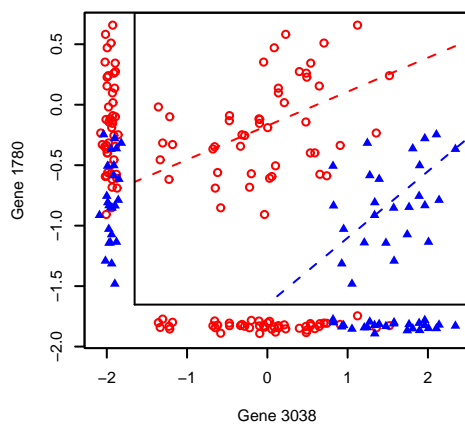

Gene Pair 11 , Score = 1.2

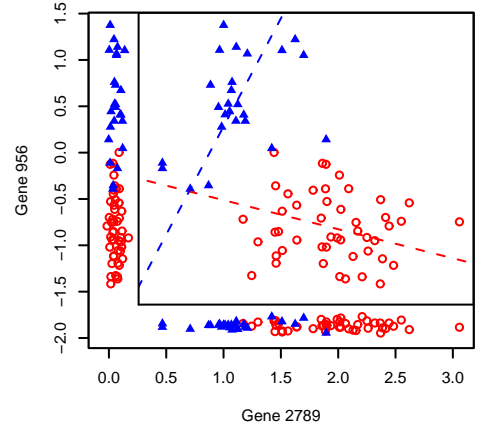

Gene Pair 12 , Score = 1.19

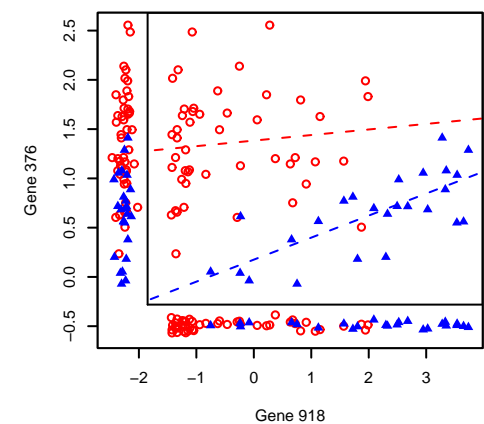

Gene Pair 1 , Score = 1.36

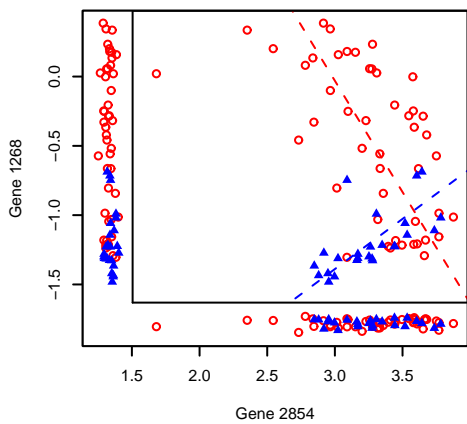

Gene Pair 2 , Score = 1.35

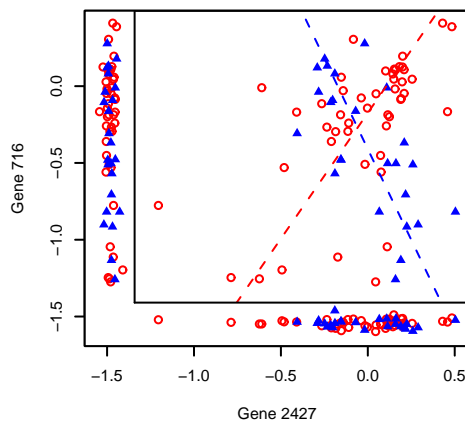

Gene Pair 3 , Score = 1.33

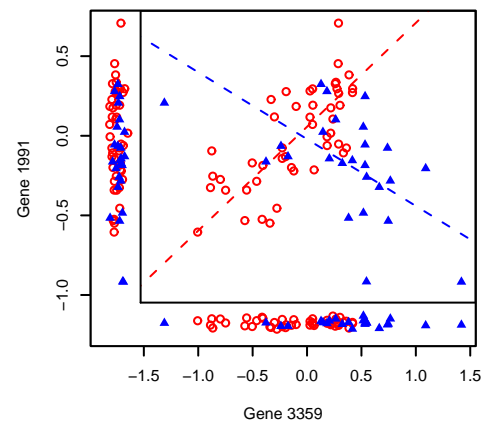

Gene Pair 4 , Score = 1.31

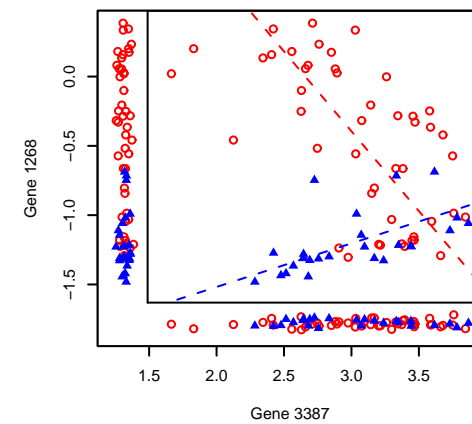

Gene Pair 5 , Score = 1.28

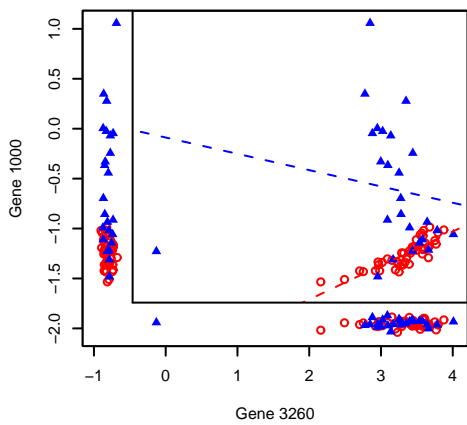

Gene Pair 6 , Score = 1.28

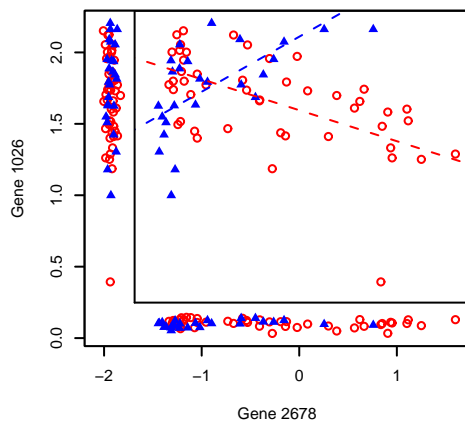

Gene Pair 7 , Score = 1.26

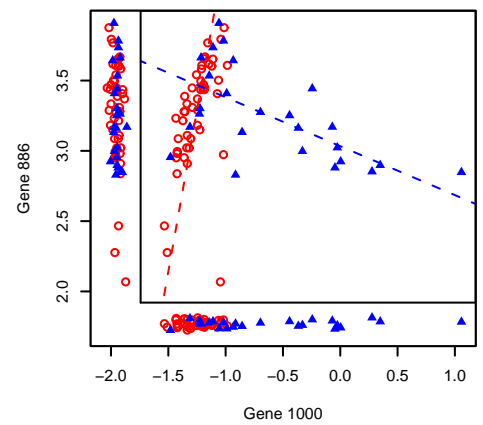

Gene Pair 8 , Score = 1.25

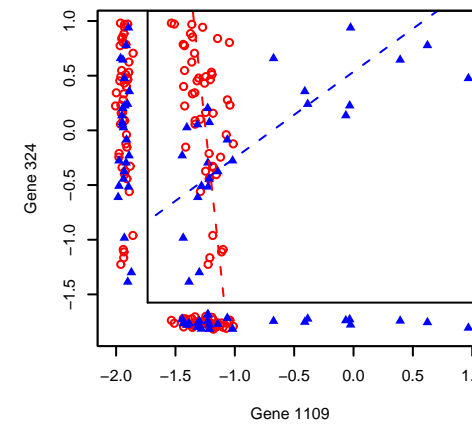

Gene Pair 9 , Score = 1.25

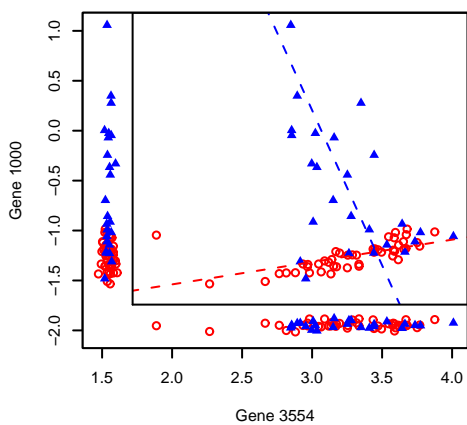

Gene Pair 10 , Score = 1.24

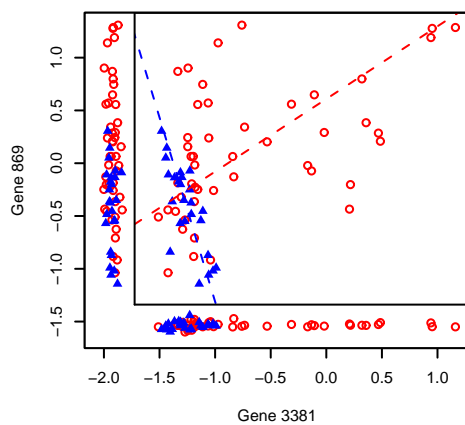

Gene Pair 11 , Score = 1.24

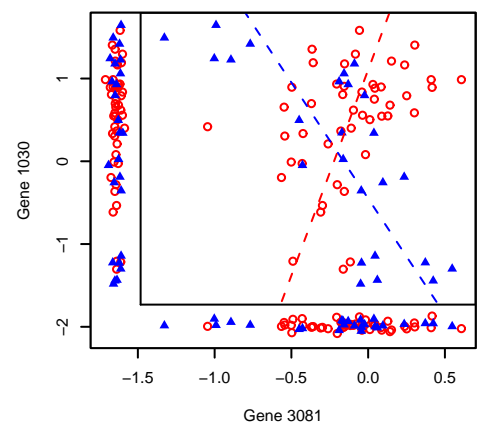

Gene Pair 12 , Score = 1.24

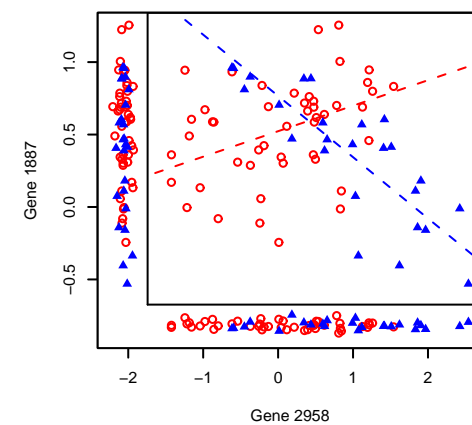

Gap/Substitution

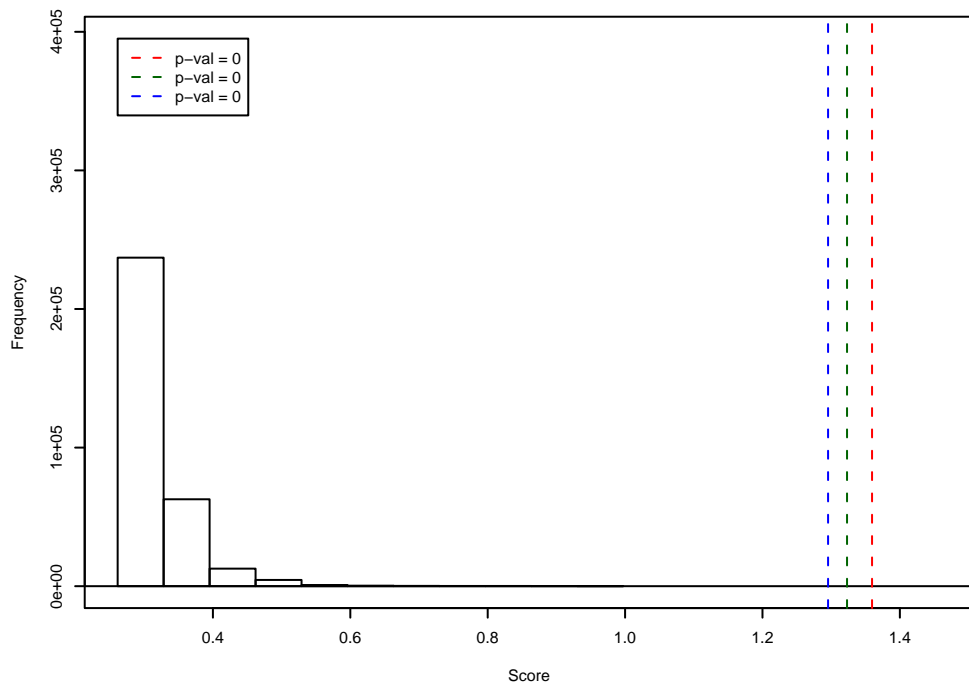

On/Off

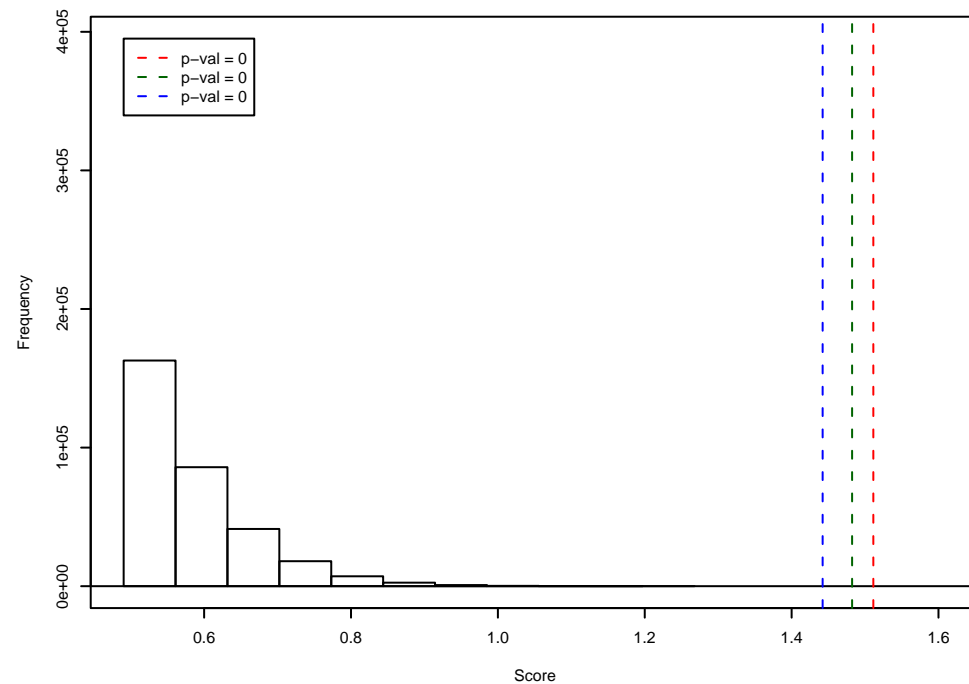

| p-value | # gp exceeding | % gp exceeding | fold advantage |
|---------|----------------|----------------|----------------|
| 0e+00   | 194            | 0.003          | Inf            |
| 1e-06   | 395            | 0.006          | 61.97          |
| 1e-05   | 1077           | 0.017          | 16.90          |
| 1e-04   | 14370          | 0.225          | 22.54          |
| 1e-03   | 106948         | 1.678          | 16.78          |

| p-value | # gp exceeding | % gp exceeding | fold advantage |
|---------|----------------|----------------|----------------|
| 0e+00   | 136            | 0.002          | Inf            |
| 1e-06   | 476            | 0.007          | 74.68          |
| 1e-05   | 1566           | 0.025          | 24.57          |
| 1e-04   | 6342           | 0.099          | 9.95           |
| 1e-03   | 30017          | 0.471          | 4.71           |
