# Supplementary material for: Searching for differentially expressed gene combinations
Source: PubMed Central journal article supplement (PMC1257471; doi:10.1186/gb-2005-6-10-r88), 2005-09-19
Supplement: gb-2005-6-10-r88-S4.pdf [file gb-2005-6-10-r88-S4.pdf]

Gene Pair 1 , Score = 1.04

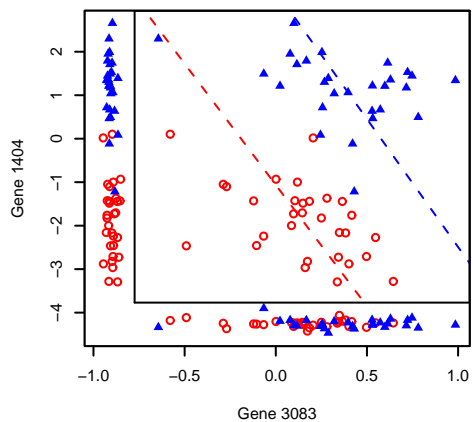

Gene Pair 2 , Score = 1.01

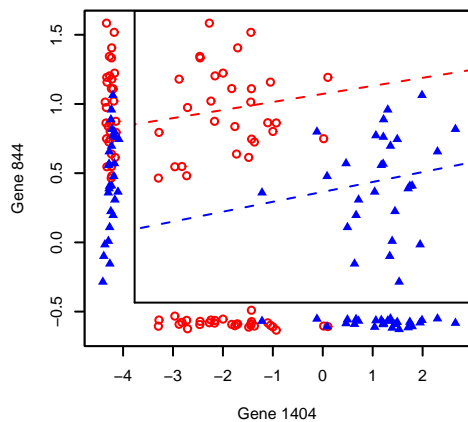

Gene Pair 3 , Score = 1

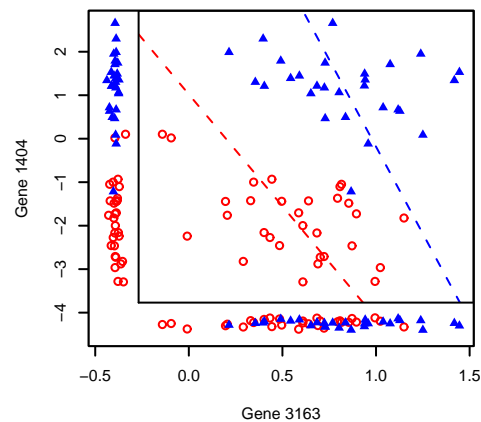

Gene Pair 4 , Score = 0.98

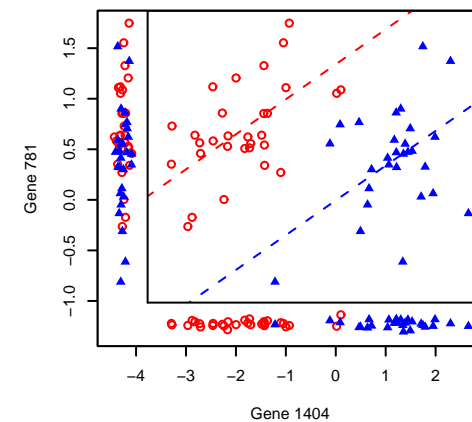

Gene Pair 5 , Score = 0.97

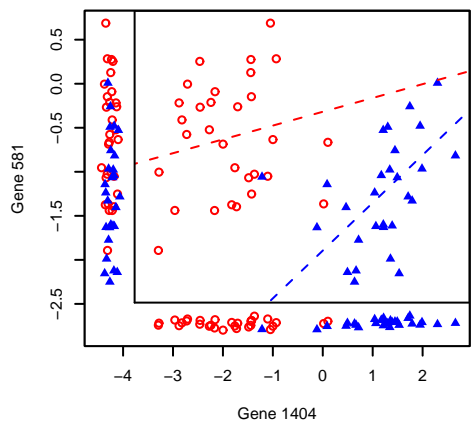

Gene Pair 6 , Score = 0.95

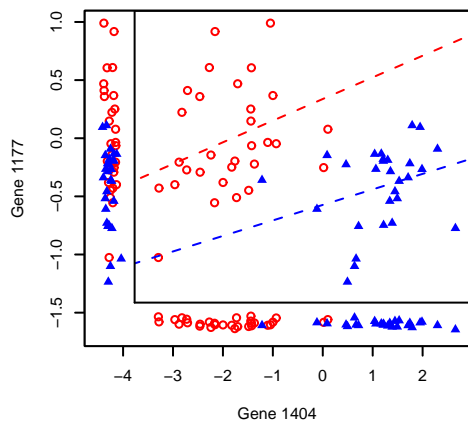

Gene Pair 7 , Score = 0.93

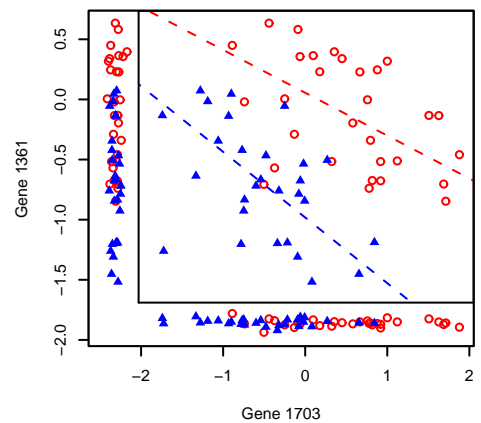

Gene Pair 8 , Score = 0.92

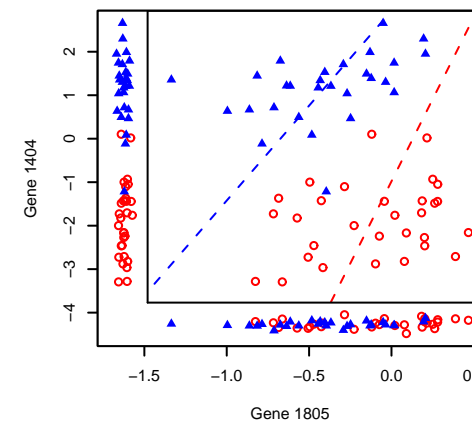

Gene Pair 9 , Score = 0.92

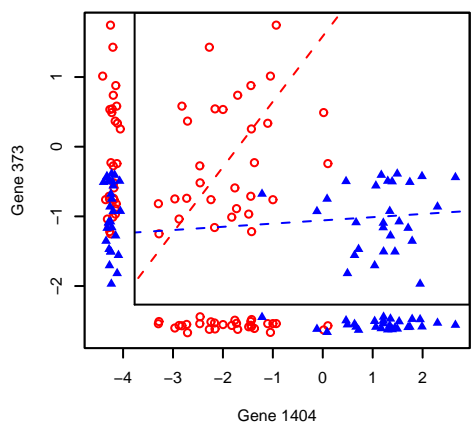

Gene Pair 10 , Score = 0.91

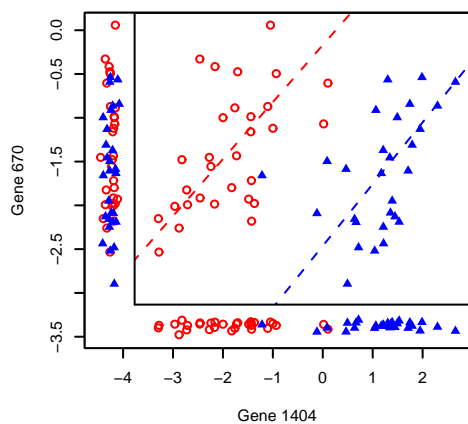

Gene Pair 11 , Score = 0.9

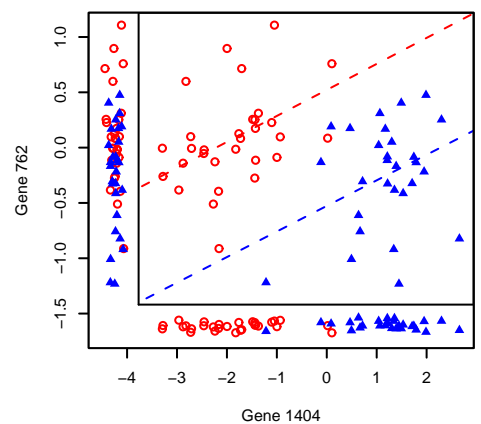

Gene Pair 12 , Score = 0.89

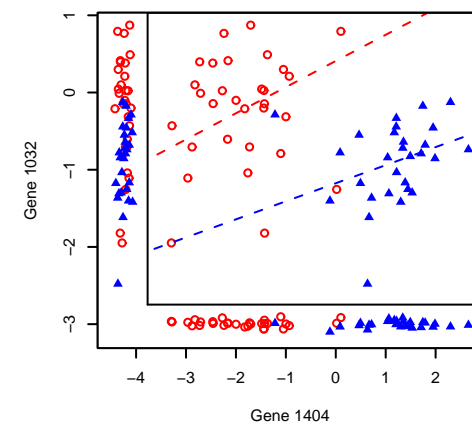

Gene Pair 1 , Score = 1.37

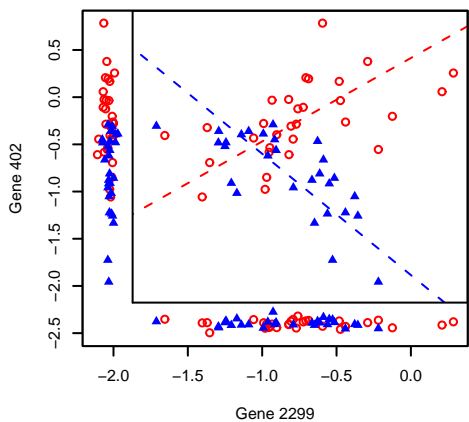

Gene Pair 2 , Score = 1.34

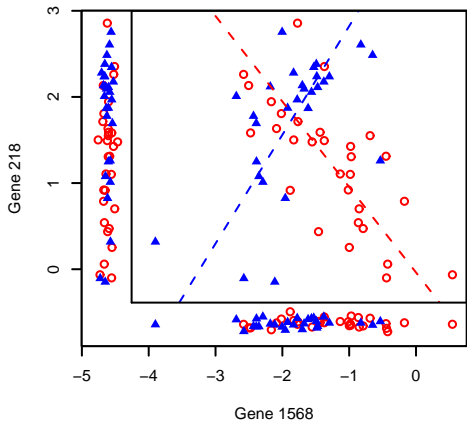

Gene Pair 3 , Score = 1.32

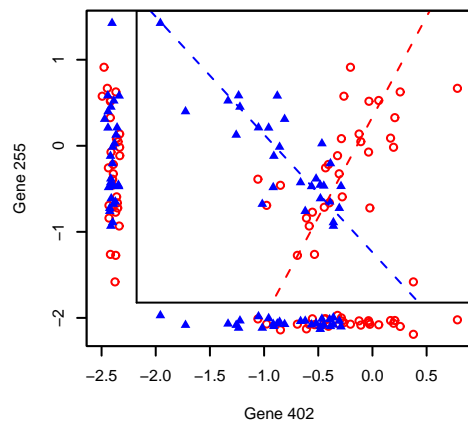

Gene Pair 4 , Score = 1.29

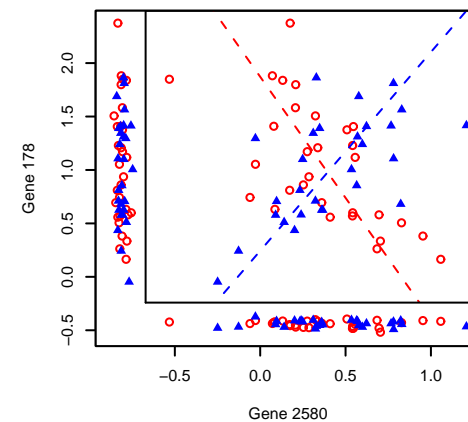

Gene Pair 5 , Score = 1.26

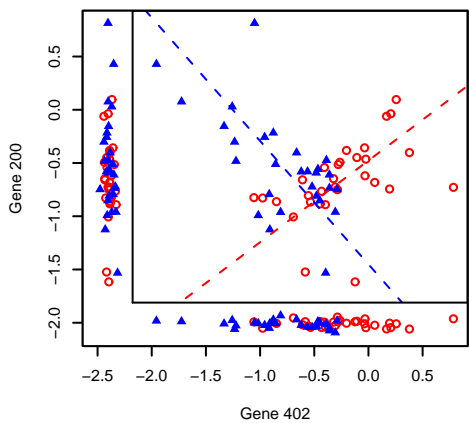

Gene Pair 6 , Score = 1.25

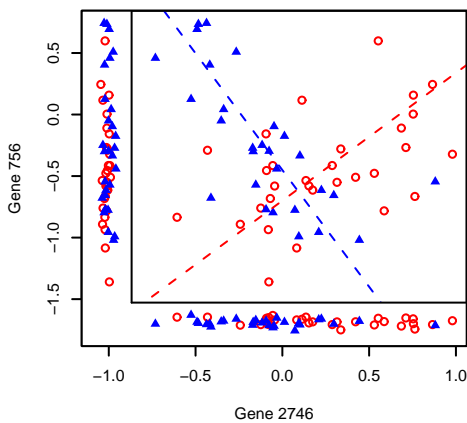

Gene Pair 7 , Score = 1.25

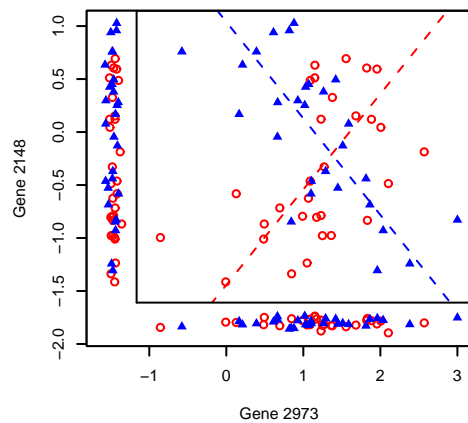

Gene Pair 8 , Score = 1.25

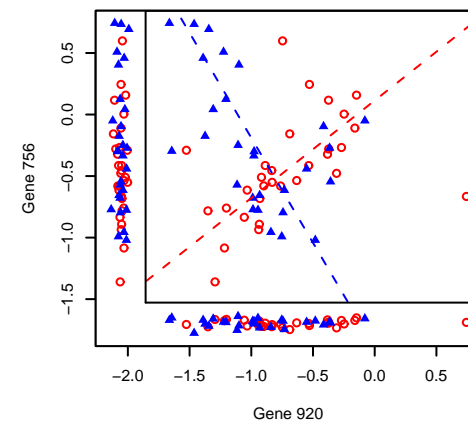

Gene Pair 9 , Score = 1.25

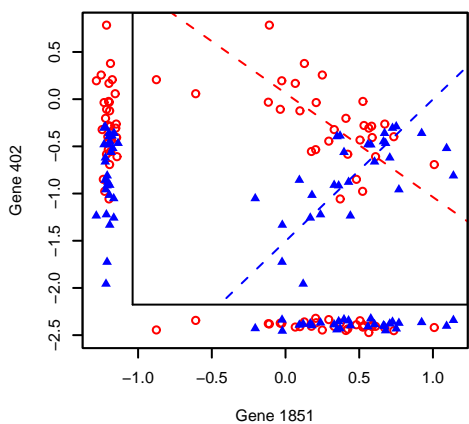

Gene Pair 10 , Score = 1.25

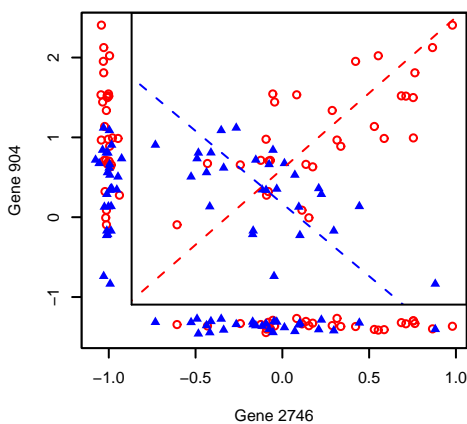

Gene Pair 11 , Score = 1.24

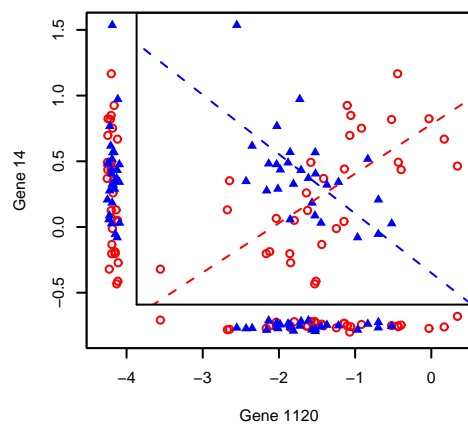

Gene Pair 12 , Score = 1.23

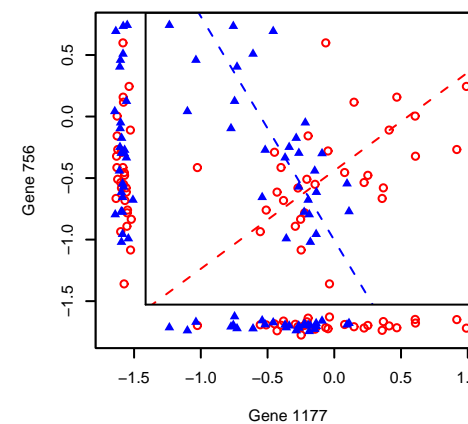

Gap/Substitution

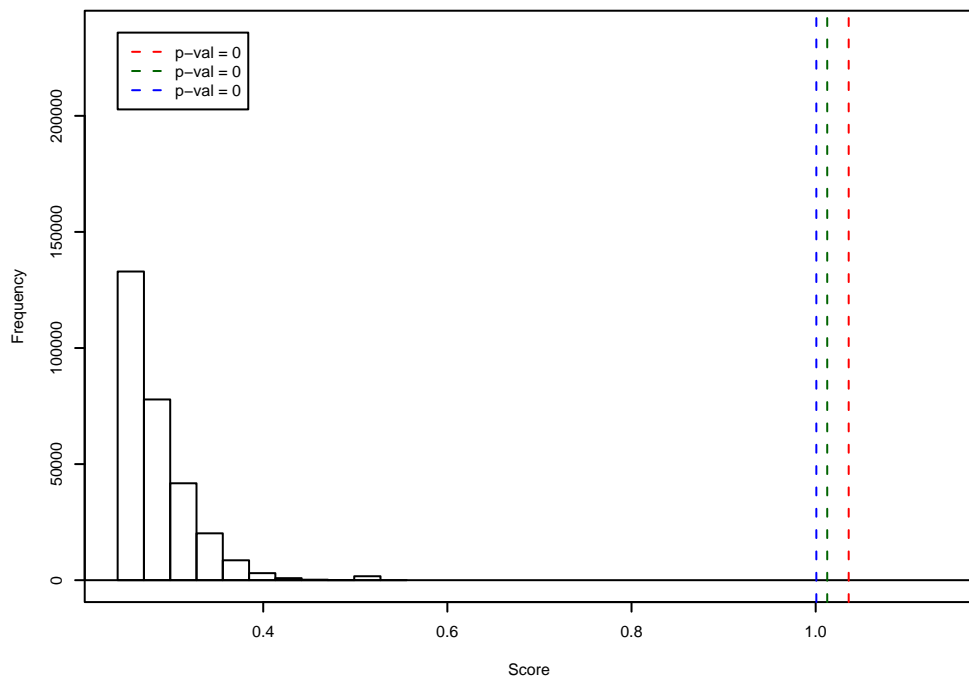

On/Off

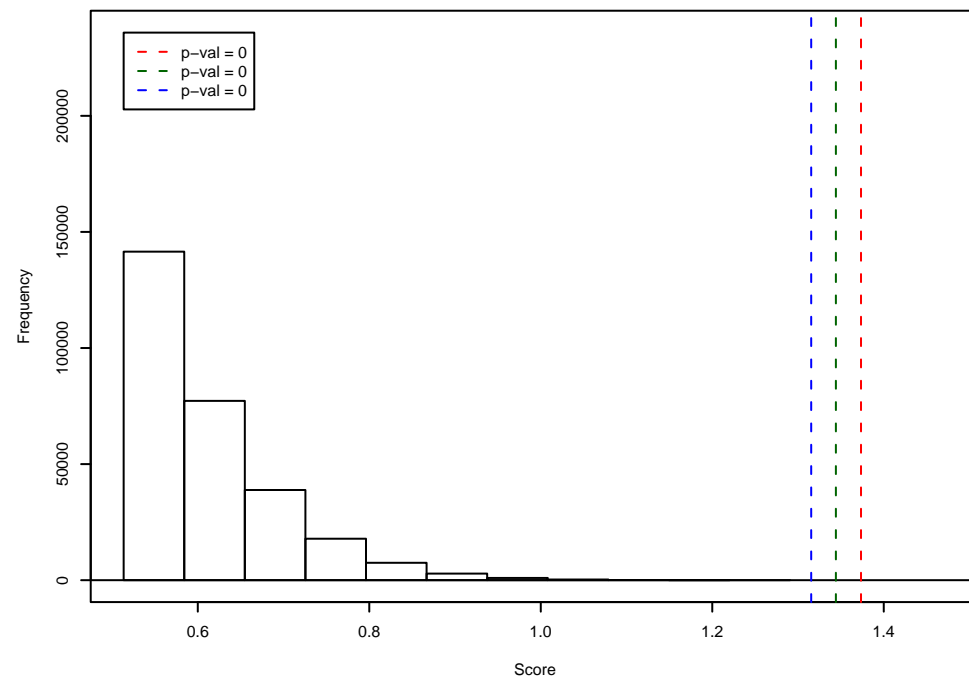

| p-value | # gp exceeding | % gp exceeding | fold advantage |
|---------|----------------|----------------|----------------|
| 0e+00   | 3107           | 0.054          | Inf            |
| 1e-06   | 5841           | 0.102          | 1017.42        |
| 1e-05   | 7191           | 0.125          | 125.26         |
| 1e-04   | 7293           | 0.127          | 12.70          |
| 1e-03   | 49557          | 0.863          | 8.63           |

| p-value | # gp exceeding | % gp exceeding | fold advantage |
|---------|----------------|----------------|----------------|
| 0e+00   | 4              | 0.000          | Inf            |
| 1e-06   | 21             | 0.000          | 3.66           |
| 1e-05   | 161            | 0.003          | 2.80           |
| 1e-04   | 1219           | 0.021          | 2.12           |
| 1e-03   | 9041           | 0.157          | 1.57           |
